# Supplementary material for: Sex- and age-dependent patterns of survival and breeding success in a long-lived endangered avian scavenger
Source: PubMed Central journal article supplement (PMC5225485; doi:10.1038/srep40204), 2017-01-11
Supplement: srep40204-s1.pdf [file srep40204-s1.pdf]

## Supplementary Information

### Sex- and age-dependent patterns of survival and breeding success in a long-lived endangered avian scavenger

Ana Sanz-Aguilar<sup>1,2,3°</sup>, Ainara Cortés-Avizanda<sup>1,4,5\*°</sup>, David Serrano<sup>1</sup>, Guillermo Blanco<sup>6</sup>, Olga Ceballos<sup>7</sup>, Juan M. Grande<sup>8,9</sup>, José L. Tella<sup>1</sup> and José A. Donazar<sup>1</sup>

<sup>1</sup> *Department of Conservation Biology, Estación Biológica de Doñana, CSIC. Americo Vespucio s/n, E-41092 Sevilla, Spain.*

<sup>2</sup> *Population Ecology Group, Instituto Mediterráneo de Estudios Avanzados (CSIC-UIB), Miquel Marqués 21, E-07190 Esporles, Islas Baleares, Spain.*

<sup>3</sup> *Ecology Area, Department of Applied Biology, Miguel Hernández University. Avda. de la Universidad s/n, E-03202 Elche, Alicante, Spain.*

<sup>4</sup> *Infraestruturas de Portugal Biodiversity Chair CIBIO/InBIO. Centro de Investigação em Biodiversidade e Recursos Genéticos, Universidade do Porto. Campus Agrário de Vairão, 4485-661 Vairão, Portugal.*

<sup>5</sup> *CEABN/InBio, Centro de Ecologia Aplicada "Professor Baeta Neves", Instituto Superior de Agronomia, Universidade de Lisboa, Tapada da Ajuda, 1349-017 Lisboa, Portugal.*

<sup>6</sup> *Department of Evolutionary Ecology, Museo Nacional de Ciencias Naturales, CSIC, José Gutiérrez Abascal 2, 28006 Madrid, Spain.*

<sup>7</sup> *UGARRA, Avda. Carlos III 1, 31002, Pamplona, Spain.*

<sup>8</sup> *Instituto de Ciencias de la Tierra y Ambientales de La Pampa, CONICET, Avda.*

*Uruguay 151, 6300 Santa Rosa, La Pampa, Argentina.*

<sup>9</sup> *Centro para el Estudio y Conservación de las Aves Rapaces en Argentina, Facultad de*

*Ciencias Exactas y Naturales, Universidad Nacional de La Pampa, Avda. Uruguay 151,*

*6300 Santa Rosa, La Pampa, Argentina.*

\*Corresponding Author: [cortesavizanda@gmail.com](mailto:cortesavizanda@gmail.com); [ainara@ebd.csic.es](mailto:ainara@ebd.csic.es)

°Both authors contributed equally to this work
